# Supplementary material for: Structural evolution of palladium nanoparticles and their electrocatalytic activity toward ethanol oxidation in alkaline solution
Source: Royal Society of Chemistry journal article supplement (doi:10.1039/c6ra18146e), 2016-01-01
Supplement: c6ra18146e1.pdf [file c6ra18146e1.pdf]

Supporting Information:

**Structure-evolution of palladium nanoparticles and their  
electrocatalytic activity toward ethanol oxidation in alkaline solution**

Changna Wen<sup>a</sup>, Zhaopeng Li<sup>a</sup>, Caiyun Cao<sup>a</sup>, Yiqian Wang<sup>b,\*</sup>, Peizhi Guo<sup>a,\*</sup>, X. S. Zhao<sup>a</sup>

<sup>a</sup> Institute of Materials for Energy and Environment, State Key Laboratory Breeding  
Based of New Fiber Materials and Modern Textile, School of Materials Science and  
Engineering, Qingdao University, Qingdao, 266071, P. R. China

<sup>b</sup> School of Physics, Qingdao University, Qingdao, 266071, P. R. China

\*Corresponding author:

E-mail address: pzguo@qdu.edu.cn, qduguo@163.com; yqwang@qdu.edu.cn

Tel: +86 532 859 53982

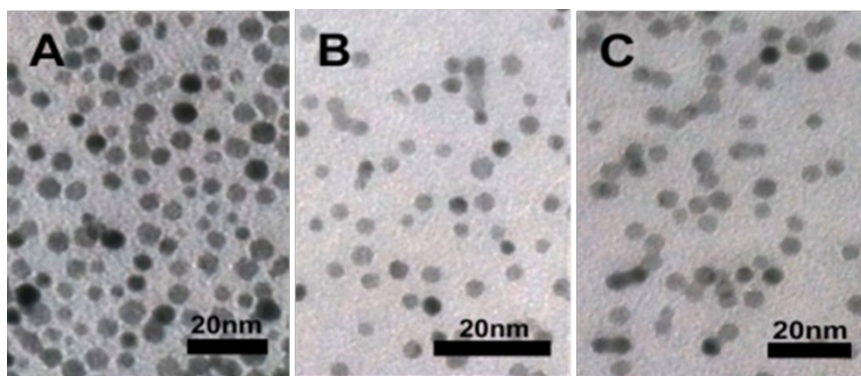

**Figure S1** TEM images of Pd intermediates during the synthesis of Pd-a with the reaction time of 30 min (A), 60 min (B) and 120 min (C).

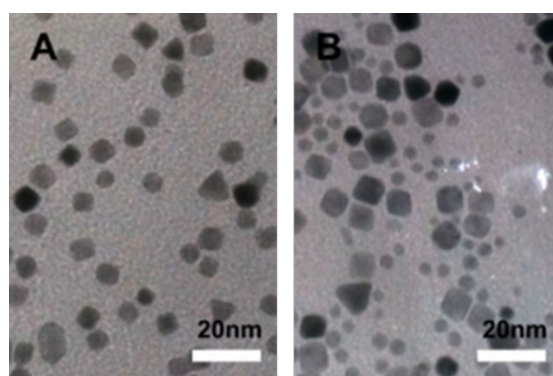

**Figure S2** TEM images of Pd products obtained from the systems containing Pd-a as the seed (3 reaction cycles) (A) and solid Pd-b as the seed (B).
